# Supplementary material
Source: Springer Nature journal article supplement (http://www.springermedizin.de/resource/supplementary/13014_2010_330_MOESM4_ESM.pdf/9633584)

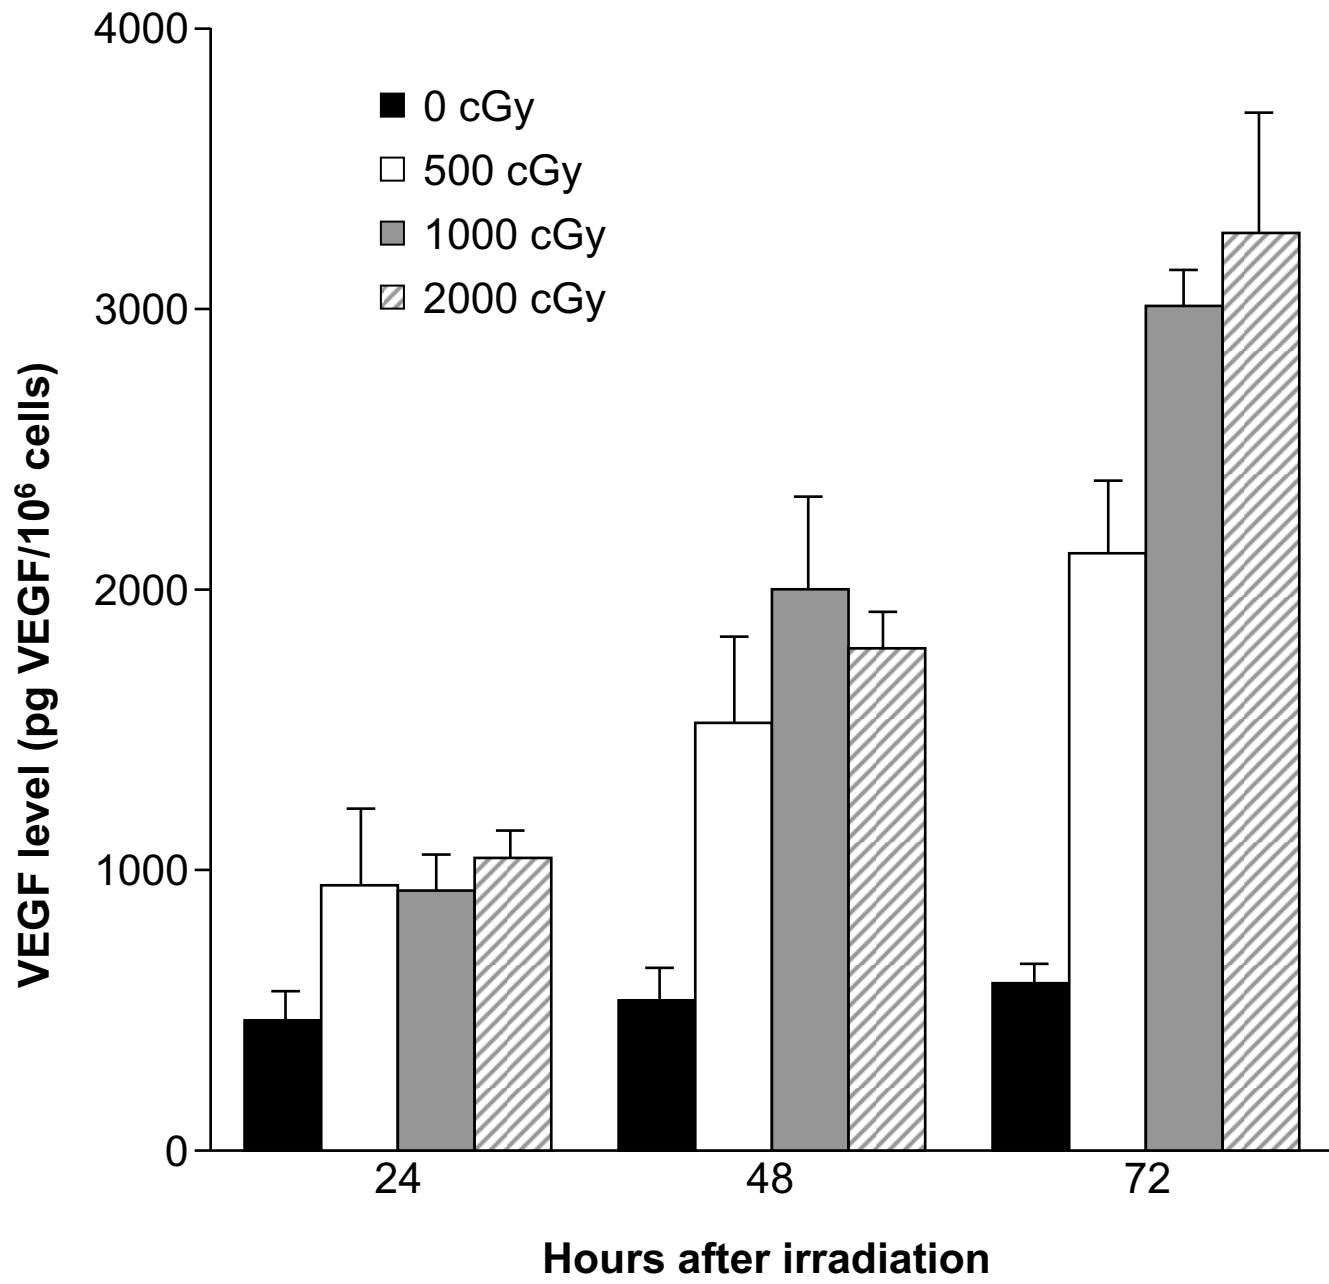

Supplement: MOESM4 [file 9633584]
